# Supplementary material for: Preservation of epithelial progenitor cells from collagenase-digested oral mucosa during ex vivo cultivation
Source: PubMed Central journal article supplement (PMC5099970; doi:10.1038/srep36266), 2016-11-08
Supplement: srep36266-s1.pdf [file srep36266-s1.pdf]

## Supplementary Information

### **Preservation of epithelial progenitor cells from collagenase-digested oral mucosa during ex vivo cultivation**

Yi-Jen Hsueh<sup>1,2</sup>, Shiang-Fu Huang<sup>3,4</sup>, Jui-Yang Lai<sup>1,2,5,6</sup>, Shih-Chieh Ma<sup>1,2</sup>, Hung-Chi Chen\*<sup>1,2,4</sup>, Sung-En Wu<sup>1,2</sup>, Tze-Kai Wang<sup>1,2</sup>, Chi-Chin Sun<sup>7,8</sup>, Kevin Sheng-Kai Ma<sup>9</sup>, Jan-Kan Chen<sup>2,10</sup>, Chyong-Huey Lai<sup>11</sup>, David Hui-Kang Ma\*<sup>1,2,8</sup>

<sup>1</sup> Limbal Stem Cell Laboratory, Department of Ophthalmology, Chang Gung Memorial Hospital, Linkou, Taiwan.

<sup>2</sup> Center for Tissue Engineering, Chang Gung Memorial Hospital, Linkou, Taiwan.

<sup>3</sup> Department of Otolaryngology, Chang Gung Memorial Hospital, Linkou, Taiwan.

<sup>4</sup> Department of Medicine, College of Medicine, Chang Gung University, Taoyuan, Taiwan.

<sup>5</sup> Institute of Biochemical and Biomedical Engineering, Chang Gung University, Taoyuan, Taiwan.

<sup>6</sup> Biomedical Engineering Research Center, Chang Gung University, Taoyuan, Taiwan.

<sup>7</sup> Department of Ophthalmology, Chang Gung Memorial Hospital, Keelung, Taiwan.

<sup>8</sup> Department of Chinese Medicine, College of Medicine, Chang Gung University, Taoyuan, Taiwan.

<sup>9</sup> Department of Dentistry, College of Oral Medicine, Chung Shan Medical University, Taichung, Taiwan.

<sup>10</sup> Department of Physiology, College of Medicine, Chang Gung University, Taoyuan, Taiwan.

<sup>11</sup> Department of Obstetrics and Gynecology, Chang Gung Memorial Hospital, Linkou, Taiwan.

#### **\*Corresponding Authors:**

David Hui-Kang Ma, MD, PhD

E-mail: [davidhkma@yahoo.com](mailto:davidhkma@yahoo.com)

Hung-Chi Chen, MD, PhD

E-mail: [mr3756@cgmh.org.tw](mailto:mr3756@cgmh.org.tw)

#### **This PDF file includes:**

Figure S1, Figure S2 and Table S1

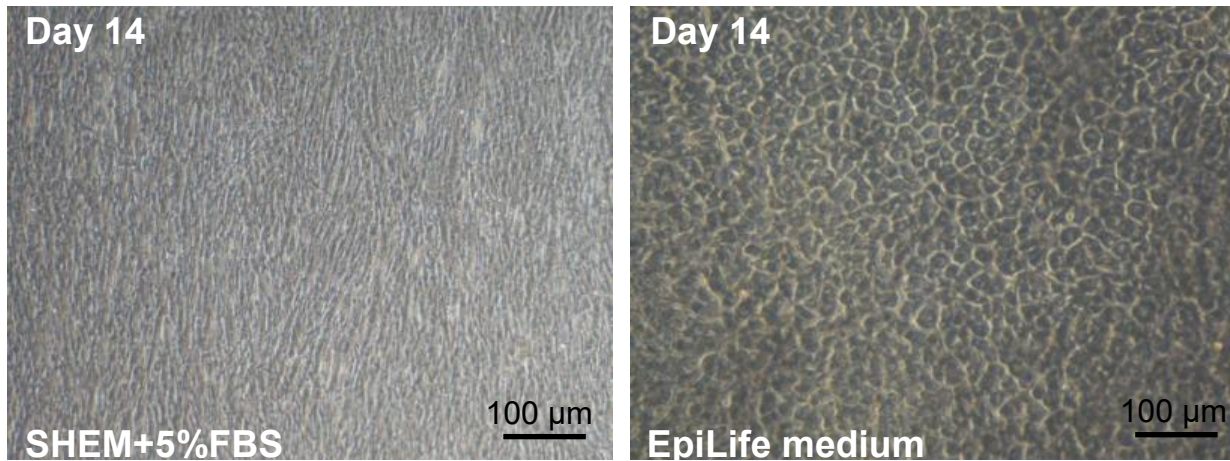

### Supplementary Figure S1

#### Submucosal mesenchymal cells contamination in collagenase-isolated oral mucosal epithelial cells (OMECS)

Left: Culture with SHEM medium containing 5% FBS, submucosal mesenchymal cells overgrowth is often encountered in OMECS isolated by collagenase. Right: In contrast, submucosal mesenchymal cells overgrowth is suppressed when the medium is changed to serum free EpiLife medium.

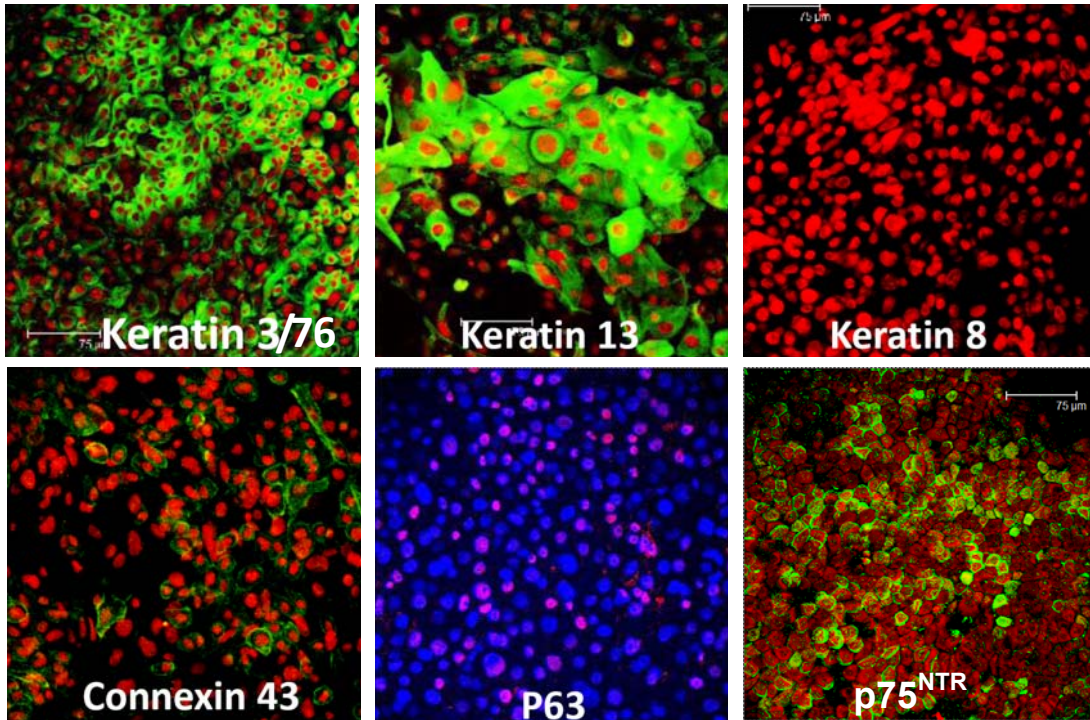

### Supplementary Figure S2

#### Characterization of human oral mucosal epithelial cells (OMECS) isolated by collagenase

Immunoconfocal microscopy showed that, similar to normal oral mucosal epithelium, OMECS isolated by collagenase and grown on de-epithelialized AM were positive for cytokeratin 3/76, 13, and connexin 43 (green), but negative for cytokeratin 8. Prominent staining for stem cell markers p63 (red) and p75<sup>NTR</sup> (green) was also evident. Cell nuclei counter-stained by PI (red) or Hoechst 33342 (blue). The bars represent 75 μm.

| No.                      | Age | Sex | Primary disease                                        | Excision site            | Microscopic finding                     |
|--------------------------|-----|-----|--------------------------------------------------------|--------------------------|-----------------------------------------|
| <b>IRB no: 101-0108B</b> |     |     |                                                        |                          |                                         |
| 1                        | 63  | M   | Left recurrent buccal cancer, cT2N0M0                  | Left buccal              | Sections show no tumor                  |
| 2                        | 57  | M   | Left buccal cancer, cT2N0M0                            | Left post. buccal        | Sections show no tumor                  |
| 3                        | 53  | M   | Left buccal SCC, pT4aN2bM0                             | Left buccal              | Sections show no tumor                  |
| 4                        | 59  | M   | Recurrent lip cancer, pT2N2bM0                         | Upper lip                | Sections show no tumor                  |
| 5                        | 47  | M   | Left buccal cancer recurrence                          | Left buccal              | Sections show no tumor                  |
| 6                        | 73  | F   | Right buccal cancer, pT3N0                             | Right upper buccal       | Sections show no tumor                  |
| 7                        | 58  | M   | Mouth floor cancer, cT1~2N0M0                          | Mouth floor              | No definite malignancy                  |
| 8                        | 42  | F   | Left buccal cancer, pT3N0M0                            | Left upper buccal        | Sections show no tumor                  |
| 9                        | 37  | M   | Right buccal cancer, pT2N2b                            | Right buccal             | Sections show no tumor                  |
| 10                       | 50  | M   | Left buccal-mouth floor cancer, pT4aN1M0               | Left buccal              | Sections show no tumor                  |
| 11                       | 45  | M   | Left buccal cancer, cT4aN2bM0                          | Left mouth floor         | All margins are negative for malignancy |
| 12                       | 53  | M   | Left retromolar squamous cell carcinoma, cT2N0M0       | Left retromolar          | All margins are negative for malignancy |
| 13                       | 56  | M   | Left lower lip cancer, cT2N0M0                         | Left lower lip           | Sections show no tumor.                 |
| <b>IRB no: 102-5895B</b> |     |     |                                                        |                          |                                         |
| 14                       | 85  | M   | Left buccal cancer, SCC cT1N0M0 pT2N0M0                | Left buccal              | All margins are negative for malignancy |
| 15                       | 37  | M   | Right lower gum cancer, pT4aN2b                        | Right buccal             | All margins are negative for malignancy |
| 16                       | 59  | M   | Right buccal squamous cell carcinoma, cT4N0M0          | Right buccal             | No definite malignancy is seen.         |
| 17                       | 44  | M   | Right retromolar trigone MDSqCC, rpT2                  | Right retromolar trigone | Sections show no tumor                  |
| 18                       | 61  | M   | Right gum cancer, pT4aN0                               | Right palate             | Sections show no tumor                  |
| 19                       | 35  | M   | Right maxillary sinus cancer, cT4aN2bM0                | Right maxillary sinus    | Sections show no tumor                  |
| 20                       | 54  | M   | Lower lip cancer                                       | Lower lip                | Sections show no tumor                  |
| 21                       | 66  | F   | Left buccal cancer, cT4bN1M0                           | Left buccal mucosa       | Sections show no tumor                  |
| 22                       | 58  | M   | Right buccal cancer recurrence, rcT2N1M0               | Right buccal             | Sections show no tumor                  |
| 23                       | 74  | M   | Right buccal cancer, cT2N0M0                           | Buccal mucosa            | Sections show no tumor                  |
| 24                       | 21  | F   | Chondroblastic osteosarcoma of Right mandible, cT2N0M0 | Right mandible           | Sections show no tumor                  |
| 25                       | 69  | M   | Lower lip cancer, cT2N0M                               | Lower lip cancer         | Sections show no tumor                  |
| 26                       | 43  | M   | Right buccal cancer T1N2bM0                            | Right buccal             | Sections show no tumor                  |
| 27                       | 51  | M   | Right buccal cancer T1N0M0                             | Right buccal             | Sections show no tumor                  |
| 28                       | 37  | M   | Left buccal cancer, cT4aN2bM0,                         | Left buccal              | No evidence of malignancy is seen.      |
| 29                       | 51  | M   | Left buccal cancer, cT1N1M0, pT2N2b                    | Left buccal              | Sections show no tumor                  |
| 30                       | 60  | M   | Right lower gum, rcT2N0, pT4aN0                        | Right lower gum          | No evidence of malignancy is seen.      |

## Supplementary Table S1

Demographic information of oral mucosa donors:
